# Supplementary material
Source: PubMed Central journal article supplement (PMC9288540)
Supplement: NIHMS1784038-supplement-1784038_Sup_Info.pdf [file NIHMS1784038-supplement-1784038_Sup_Info.pdf]

## Supplementary Information

**Supplementary Table 1.** Demographics for small RNA-sequencing subset

|                                          | <b>NHB (N=36)</b> | <b>NHW (N=41)</b> |                       |
|------------------------------------------|-------------------|-------------------|-----------------------|
| <b>Maternal</b>                          | <b>mean ± SD</b>  | <b>mean ± SD</b>  | <b><i>P-value</i></b> |
| <b>Age (years)</b>                       | <b>26 ± 4</b>     | <b>30 ± 6</b>     | <b>0.001</b>          |
| Pre-gravid BMI (Lean/Obese) <sup>β</sup> | 17/19             | 22/19             | 0.737                 |
| Net Gestational Weight gain (kg)         | 9.7 ± 8           | 12.3 ± 7          | 0.154                 |
| Gestational Weight gain (kg)             | 13.4 ± 8          | 16.2 ± 7          | 0.120                 |
| Smoking (N/Y) <sup>β</sup>               | 29/7              | 35/6              | 0.796                 |
| <b>Neonatal</b>                          |                   |                   |                       |
| Gestational Age (wks)                    | 39 ± 0.7          | 39 ± 0.5          | 0.480                 |
| Placenta weight (g)                      | 612 ± 162         | 681 ± 213         | 0.113                 |
| Birth weight (kg)                        | 3.2 ± 0.5         | 3.4 ± 0.6         | 0.115                 |
| Placenta efficiency <sup>γ</sup>         | 5.2 ± 0.9         | 5.2 ± 0.9         | 0.821                 |
| Length (cm)                              | 49 ± 2            | 49 ± 2            | 0.195                 |
| Sex (M/F) <sup>β</sup>                   | 21/15             | 20/21             | 0.542                 |

Values are mean ± standard deviation. <sup>γ</sup>Placenta efficiency: Birth weight(g)/Placenta weight(g). *P-values* calculated by Student's t-test. <sup>β</sup>*P-value*. Calculated by Chi-squared test.

**Supplementary Table 2.** Placental miRNA differentially expressed (DE) between NHB and NHW women based on small RNA-sequencing

| DE miRNA ↑ in placentas of NHB vs NHW women |                |                     | DE miRNA ↓ in placentas of NHB vs NHW women |                |                     |
|---------------------------------------------|----------------|---------------------|---------------------------------------------|----------------|---------------------|
| miRNAs                                      | <i>P-value</i> | <i>Adj. P-value</i> | miRNAs                                      | <i>P-value</i> | <i>Adj. P-value</i> |
| hsa-miR-6826-3p                             | 7.59E-05       | 0.005787            | hsa-miR-9-3p                                | 0.0005         | 0.0299              |
| hsa-miR-346                                 | 0.000417       | 0.025004            | hsa-miR-217                                 | 9.15E-06       | 0.0010              |
| hsa-miR-1307-5p                             | 0.000976       | 0.044862            | hsa-miR-216a-3p                             | 0.0009         | 0.0448              |
| hsa-miR-4482-3p                             | 6.37E-10       | 5.34E-07            | hsa-miR-216a-5p                             | 4.05E-05       | 0.0033              |
| hsa-miR-4482-5p                             | 2.60E-07       | 6.23E-05            | hsa-miR-3129-5p                             | 8.81E-05       | 0.0064              |
| hsa-miR-1304-3p                             | 5.68E-06       | 0.000733            | hsa-miR-2115-3p                             | 0.0009         | 0.0448              |
| hsa-miR-34b-5p                              | 7.12E-07       | 0.000119            | hsa-miR-2115-5p                             | 1.06E-05       | 0.0011              |
| hsa-miR-34b-3p                              | 2.27E-08       | 9.51E-06            | hsa-miR-9-3p                                | 0.0005         | 0.0299              |
| hsa-miR-34c-5p                              | 1.32E-12       | 2.21E-09            | hsa-miR-146a-5p                             | 3.34E-05       | 0.0029              |
| hsa-miR-34c-3p                              | 5.31E-07       | 9.90E-05            | hsa-miR-7-5p                                | 0.0004         | 0.0278              |
| hsa-miR-181c-5p                             | 1.32E-07       | 3.68E-05            | hsa-miR-6877-5p                             | 0.0009         | 0.0448              |
| hsa-miR-181c-3p                             | 1.63E-08       | 9.10E-06            | hsa-miR-5699-3p                             | 0.0002         | 0.0157              |
| hsa-miR-181d-5p                             | 0.000781       | 0.040925            | hsa-miR-548f-5p                             | 0.0008         | 0.0420              |
| hsa-miR-301b-3p                             | 2.23E-05       | 0.002077            | hsa-miR-192-5p                              | 1.18E-05       | 0.0012              |
| hsa-miR-664b-3p                             | 9.65E-05       | 0.006745            | hsa-miR-3664-3p                             | 3.45E-06       | 0.0004              |
|                                             |                |                     | hsa-miR-147b                                | 7.63E-08       | 2.56E-05            |
|                                             |                |                     | hsa-miR-3529-3p                             | 0.0004         | 0.0278              |
|                                             |                |                     | hsa-miR-7-5p                                | 0.0004         | 0.0278              |
|                                             |                |                     | hsa-miR-9-3p                                | 0.0005         | 0.0299              |
|                                             |                |                     | hsa-miR-7-5p                                | 0.0004         | 0.0278              |
|                                             |                |                     | hsa-miR-941                                 | 0.0010         | 0.0448              |
|                                             |                |                     | hsa-miR-155-5p                              | 1.47E-05       | 0.0014              |
|                                             |                |                     | hsa-miR-223-5p                              | 3.2E-07        | 6.71E-05            |
|                                             |                |                     | hsa-miR-223-3p                              | 1.97E-06       | 0.0003              |
|                                             |                |                     | hsa-miR-505-3p                              | 0.0003         | 0.0189              |
|                                             |                |                     | hsa-miR-505-5p                              | 0.0010         | 0.0448              |
|                                             |                |                     | hsa-miR-508-3p                              | 0.0001         | 0.0086              |
|                                             |                |                     | hsa-miR-514a-3p                             | 6.37E-05       | 0.0050              |

**Supplementary Table 3.** Results from miRNet 2.0 – a miRNA-centric network visual analytics platform (186 unique genes for placental miRNA highly expressed in non-Hispanic Black women)

| Placental derived miRNA | Targeted Genes                                                                                                                                                                                                                                                                                                                                                                           |
|-------------------------|------------------------------------------------------------------------------------------------------------------------------------------------------------------------------------------------------------------------------------------------------------------------------------------------------------------------------------------------------------------------------------------|
| <b>hsa-miR-34c-5p</b>   | <b>BCL2, GIGYF1, BAZ2A, CDK4, CDK6, HSPA1B, NFE2L1, SRSF2, TGFBR2, YY1, ARHGAP1, CCL22, CNOT4, DDX19B, GXYLT2, IFNLR1, IL6R, KBTBD6, LDHA, MAST3, MET, MLLT1, MRNIP, MYC, MYCN, POTES, SHMT1, SHOC2, SLC35G2, RPA2</b>                                                                                                                                                                   |
| hsa-miR-34c-3p          | REEP5, XIAP, PHF12, RCOR1, REL, SYNM                                                                                                                                                                                                                                                                                                                                                     |
| hsa-miR-34b-3p          | BCL2, CDK4, CDK6, DYNC1LI2, HSPA1B, REEP5, XIAP, YY1, ZNF417, ARHGAP1, CAMSAP2, CHD9, CLCC1, CREB1, GXYLT2, IL6R, LDHA, MAPK14, MET, MRNIP, MYC, MYCN, SHMT1, SRSF7, SYNM, ZNF699                                                                                                                                                                                                        |
| hsa-miR-34b-5p          | BCL2, GIGYF1, BAZ2A, CDK4, CDK6, NFE2L1, SRSF2, TGFBR2, XIAP, CNOT4, CREB1, GXYLT2, IFNLR1, MAST3, MET, MLLT1, MYC, MYCN, RHOG, TROVE2                                                                                                                                                                                                                                                   |
| <b>hsa-miR-181d-5p</b>  | <b>BCL2, GIGYF1, BAZ2A, DYNC1LI2, HSPA1B, KLHL15, LBR, LDLR, RAN, TNRC6B, ZNF107, BMPR2, CADPS2, CAPRIN2, CCL22, CHD9, CLCC1, DCBLD2, EFCAB14, EN2, ETS1, G3BP2, GK5, GSKIP, KDM5A, LCLAT1, MIGA2, NAA50, NCAPG, NR6A1, PARD6B, PNKD, RCOR1, RHOG, RLIM, RSBN1L, RSF1, SHOC2, SLC35G2, SMCR8, TBL1XR1, TLDC1, TMEM30A, ZBTB4, ZNF268, ZNF439, ZNF487, ZNF556, ZNF616, ZNF699, ZNF829</b> |
| hsa-miR-181c-5p         | BCL2, GIGYF1, BAZ2A, DYNC1LI2, KLHL15, LBR, LDLR, RAN, TGFBR2, TNRC6B, ZNF107, BMPR2, CADPS2, CAPRIN2, CCL22, CHD9, CLCC1, DCBLD2, EFCAB14, EN2, ETS1, G3BP2, GK5, GSKIP, KDM5A, LCLAT1, MIGA2, NAA50, NCAPG, NLK, NR6A1, PNKD, POTES, RCOR1, RHOG, RLIM, RSBN1L, RSF1, SHOC2, SLC35G2, SMCR8, TBL1XR1, TLDC1, TMEM30A, ZBTB4, ZNF268, ZNF439, ZNF487, ZNF556, ZNF616, ZNF699, ZNF829    |
| hsa-miR-181c-3p         | G3BP2, TBL1XR1                                                                                                                                                                                                                                                                                                                                                                           |
| hsa-miR-301b-3p         | CDK4, DYNC1LI2, LDLR, NFE2L1, PNRC1, RAN, SRSF2, TGFBR2, TNRC6B, XIAP, YY1, ZNF107, ZNF417, ARHGAP1, CAMSAP2, CAPRIN2, CNOT4, DCBLD2, IFNLR1, KBTBD6, LCLAT1, MIGA2, NAA50, PHF12, RLIM, RNF11, TMEM30A, TROVE2, ZBTB4                                                                                                                                                                   |
| hsa-miR-1304-3p         | KLHL15, LDLR, PNRC1, REEP5, SRSF2, YY1, ZNF417, BMPR2, DDX19B, GK5, IL6R, KBTBD6, KDM5A, LDHA, MRNIP, NLK, PHF12, POTES, REL, RNF11, RSBN1L, SRSF7, ZNF439, ZNF487, ZNF556, ZNF829                                                                                                                                                                                                       |
| hsa-miR-301b-3p         | CDK4, DYNC1LI2, LDLR, NFE2L1, PNRC1, RAN, SRSF2, TGFBR2, TNRC6B, XIAP, YY1, ZNF107, ZNF417, ARHGAP1, CAMSAP2, CAPRIN2, CNOT4, DCBLD2, IFNLR1, KBTBD6, LCLAT1, MIGA2, NAA50, PHF12, RLIM, RNF11, TMEM30A, TROVE2, ZBTB4                                                                                                                                                                   |
| hsa-miR-664b-3p         | HSPA1B, LBR, PNRC1, RAN, REEP5, ZNF107, CREB1, EN2, GSKIP, MAPK14, NCAPG, NLK, PARD6B, RNF11, SHMT1, SYNM, TLDC1, TROVE2, ZNF616                                                                                                                                                                                                                                                         |
| <b>hsa-miR-346</b>      | <b>ACVR2B, BTG2, CAMSAP2, CAND1, CCND2, CD164, CDK6, CELF1, DDX3X, DICER1, LIF, MTPN, NFIA, NFIB, NR6A1, PIK3R3, PNRC1, RAD51AP1, RPA2, SFT2D2, SYNCRIP, SYNM, TCF7L2, TMEM245, TMEM64, UBAP2L, BE2W, UCHL1, ZNF417</b>                                                                                                                                                                  |
| <b>hsa-miR-4482-3p</b>  | <b>KLHL15, CAMSAP2, MAPK14, MLLT1, PARD6B, RSF1, SRSF7, ZNF268</b>                                                                                                                                                                                                                                                                                                                       |
| <b>hsa-miR-4482-5p</b>  | <b>CDK6, PNRC1, TNRC6B, DDX19B, REL, SMCR8</b>                                                                                                                                                                                                                                                                                                                                           |
| hsa-mir-1307-5p         | BTG2, DICER1, EDEM3, OGT, RPL37                                                                                                                                                                                                                                                                                                                                                          |

**Supplementary Table 4.** Cell signaling pathways targeted by miRNAs highly expressed in placentas of non-Hispanic Black women (Reactome 2020 Database)

| Pathway name                                                                 | Entities<br><i>P-Value</i> | Entities<br><b>FDR</b> | Genes                                                                                                                         |
|------------------------------------------------------------------------------|----------------------------|------------------------|-------------------------------------------------------------------------------------------------------------------------------|
| <b>Attenuation phase</b>                                                     | <b>3.94E-08</b>            | <b>1.88E-05</b>        | <b>HSPA1B</b>                                                                                                                 |
| <b>HSF1-dependent transactivation</b>                                        | <b>1.81E-07</b>            | <b>4.31E-05</b>        | <b>HSPA1B</b>                                                                                                                 |
| <b>HSF1 activation</b>                                                       | <b>5.57E-07</b>            | <b>8.81E-05</b>        | <b>RPA2;HSPA1B</b>                                                                                                            |
| <b>Regulation of HSF1-mediated heat shock response</b>                       | <b>1.12E-06</b>            | <b>1.34E-04</b>        | <b>RPA2;HSPA1B</b>                                                                                                            |
| <b>Cellular response to heat stress</b>                                      | <b>4.13E-06</b>            | <b>3.93E-04</b>        | <b>RPA2;HSPA1B</b>                                                                                                            |
| <b>Gene expression (Transcription)</b>                                       | <b>8.80E-06</b>            | <b>6.95E-04</b>        | <b>TCF7L2;BTG2;CBX6;RPA2;BAZ2A;DICER1;SOD2;YY1;NR6A1;CCND2;CDK6;NFIA;RRAGD;CDC27;SRSF2;E2F5;ZNF664;SRSF7;E2F7;DCP2;TNRC6B</b> |
| <b>RNA Polymerase II Transcription</b>                                       | <b>1.14E-04</b>            | <b>0.007</b>           | <b>TCF7L2;BTG2;CBX6;RPA2;SOD2;YY1;NR6A1;CCND2;CDK6;RRAGD;CDC27;SRSF2;E2F5;ZNF664;SRSF7;E2F7;DCP2;TNRC6B</b>                   |
| <b>Generic Transcription Pathway</b>                                         | <b>2.24E-04</b>            | <b>0.013</b>           | <b>TCF7L2;BTG2;CBX6;RPA2;SOD2;YY1;NR6A1;CCND2;CDK6;RRAGD;CDC27;E2F5;ZNF664;E2F7;DCP2;TNRC6B</b>                               |
| <b>Nuclear Receptor transcription pathway</b>                                | <b>3.11E-04</b>            | <b>0.016</b>           | <b>NR6A1</b>                                                                                                                  |
| <b>UCH proteinases</b>                                                       | <b>5.61E-04</b>            | <b>0.025</b>           | <b>YY1;UCHL1;INO80D;MBD6;TGFB2</b>                                                                                            |
| <b>Cellular responses to stress</b>                                          | <b>5.95E-04</b>            | <b>0.025</b>           | <b>CBX6;CDK6;RRAGD;CDC27;RPA2;RPL37;SOD2;HSPA1B;DCP2;TNRC6B</b>                                                               |
| <b>Cellular responses to stimuli</b>                                         | <b>7.28E-04</b>            | <b>0.028</b>           | <b>CBX6;CDK6;RRAGD;CDC27;RPA2;RPL37;SOD2;HSPA1B;DCP2;TNRC6B</b>                                                               |
| <b>TP53 Regulates Transcription of Cell Cycle Genes</b>                      | <b>0.001</b>               | <b>0.037</b>           | <b>BTG2;E2F7</b>                                                                                                              |
| <b>Interleukin-7 signaling</b>                                               | <b>0.001</b>               | <b>0.042</b>           | <b>PIK3R3;BRWD1</b>                                                                                                           |
| <b>Regulation of RUNX1 Expression and Activity</b>                           | <b>0.001</b>               | <b>0.042</b>           | <b>CCND2;CDK6;TNRC6B</b>                                                                                                      |
| Aberrant regulation of mitotic cell cycle due to RB1 defects                 | 0.001                      | 0.054                  | CCND2;CDK6;CDC27                                                                                                              |
| SHOC2 M1731 mutant abolishes MRAS complex function                           | 0.002                      | 0.054                  | PPP1CC;SHOC2                                                                                                                  |
| Diseases of mitotic cell cycle                                               | 0.002                      | 0.054                  | CCND2;CDK6;CDC27                                                                                                              |
| RHOV GTPase cycle                                                            | 0.002                      | 0.054                  | DST;WASL;SPTBN1                                                                                                               |
| Signaling by MRAS-complex mutants                                            | 0.002                      | 0.054                  | PPP1CC;SHOC2                                                                                                                  |
| Gain-of-function MRAS complexes activate RAF signaling                       | 0.002                      | 0.054                  | PPP1CC;SHOC2                                                                                                                  |
| BH3-only proteins associate with and inactivate anti-apoptotic BCL-2 members | 0.002                      | 0.054                  | BCL2                                                                                                                          |
| Interleukin-4 and Interleukin-13 signaling                                   | 0.003                      | 0.063                  | BCL2;LIF;MCL1                                                                                                                 |
| Global Genome Nucleotide Excision Repair (GG-NER)                            | 0.003                      | 0.068                  | YY1;INO80D;CDC27;RPA2                                                                                                         |

|                                                                                                                  |       |       |                                  |
|------------------------------------------------------------------------------------------------------------------|-------|-------|----------------------------------|
| Signaling by Interleukins                                                                                        | 0.004 | 0.077 | BCL2;LIF;PIK3R3;BRWD1;SOD2;MCL1  |
| Transcriptional Regulation by VENTX                                                                              | 0.004 | 0.077 | TCF7L2;CDC27;TNRC6B              |
| Cyclin D associated events in G1                                                                                 | 0.005 | 0.087 | CCND2;CDK6;E2F5                  |
| G1 Phase                                                                                                         | 0.005 | 0.087 | CCND2;CDK6;E2F5                  |
| Defective binding of RB1 mutants to E2F1,(E2F2, E2F3)                                                            | 0.006 | 0.090 | CCND2;CDK6                       |
| Aberrant regulation of mitotic G1/S transition in cancer due to RB1 defects                                      | 0.006 | 0.090 | CCND2;CDK6                       |
| NR1H2 & NR1H3 regulate gene expression linked to lipogenesis                                                     | 0.006 | 0.090 | SCD                              |
| Mitotic G1 phase and G1/S transition                                                                             | 0.006 | 0.090 | CCND2;CDK6;RPA2;E2F5             |
| Removal of the Flap Intermediate                                                                                 | 0.006 | 0.091 | CDC27;RPA2                       |
| Processive synthesis on the lagging strand                                                                       | 0.007 | 0.091 | CDC27;RPA2                       |
| Signaling by TGFB family members                                                                                 | 0.007 | 0.091 | PPP1CC;E2F5;ACVR2B;TGFB2         |
| TP53 Regulates Transcription of Genes Involved in G1 Cell Cycle Arrest                                           | 0.008 | 0.098 | E2F7                             |
| Nucleotide Excision Repair                                                                                       | 0.008 | 0.105 | YY1;INO80D;CDC27;RPA2            |
| Removal of the Flap Intermediate from the C-strand                                                               | 0.009 | 0.107 | CDC27;RPA2                       |
| Mismatch repair (MMR) directed by MSH2:MSH3 (MutSbeta)                                                           | 0.009 | 0.107 | CDC27;RPA2                       |
| Mismatch repair (MMR) directed by MSH2:MSH6 (MutSalpha)                                                          | 0.009 | 0.107 | CDC27;RPA2                       |
| PCNA-Dependent Long Patch Base Excision Repair                                                                   | 0.010 | 0.107 | CDC27;RPA2                       |
| Mismatch Repair                                                                                                  | 0.010 | 0.107 | CDC27;RPA2                       |
| Nephrin family interactions                                                                                      | 0.012 | 0.122 | WASL;SPTBN1                      |
| HDR through Homologous Recombination (HRR)                                                                       | 0.013 | 0.122 | RAD51AP1;CDC27;RPA2              |
| TGFBR2 MSI Frameshift Mutants in Cancer                                                                          | 0.013 | 0.122 | TGFBR2                           |
| Lagging Strand Synthesis                                                                                         | 0.013 | 0.122 | CDC27;RPA2                       |
| Gap-filling DNA repair synthesis and ligation in GG-NER                                                          | 0.014 | 0.124 | CDC27;RPA2                       |
| Signaling by Nuclear Receptors                                                                                   | 0.015 | 0.124 | YY1;SCD;BCL2;PIK3R3;TNRC6B       |
| Downregulation of TGF-beta receptor signaling                                                                    | 0.015 | 0.124 | PPP1CC;TGFB2                     |
| TP53 regulates transcription of additional cell cycle genes whose exact role in the p53 pathway remain uncertain | 0.015 | 0.124 | BTG2                             |
| DNA Replication                                                                                                  | 0.015 | 0.124 | CDC27;RPA2                       |
| Estrogen-dependent nuclear events downstream of ESR-membrane signaling                                           | 0.016 | 0.124 | BCL2                             |
| Transcriptional Regulation by TP53                                                                               | 0.017 | 0.124 | BTG2;RRAGD;RPA2;E2F7;DCP2;TNRC6B |

|                                                                                                   |       |       |                                         |
|---------------------------------------------------------------------------------------------------|-------|-------|-----------------------------------------|
| Recognition of DNA damage by PCNA-containing replication complex                                  | 0.017 | 0.124 | CDC27;RPA2                              |
| Neurodegenerative Diseases                                                                        | 0.017 | 0.124 | SOD2                                    |
| Deregulated CDK5 triggers multiple neurodegenerative pathways in Alzheimer's disease models       | 0.017 | 0.124 | SOD2                                    |
| Cell Cycle, Mitotic                                                                               | 0.019 | 0.124 | PPP1CC;CCND2;CDK6;TAOK1;CDC27;RPA2;E2F5 |
| Resolution of AP sites via the multiple-nucleotide patch replacement pathway                      | 0.020 | 0.124 | CDC27;RPA2                              |
| Signaling by TCF7L2 mutants                                                                       | 0.020 | 0.124 | TCF7L2                                  |
| Evasion of Oxidative Stress Induced Senescence Due to Defective p16INK4A binding to CDK4 and CDK6 | 0.020 | 0.124 | CDK6                                    |
| Evasion of Oncogene Induced Senescence Due to Defective p16INK4A binding to CDK4 and CDK6         | 0.020 | 0.124 | CDK6                                    |
| Evasion of Oxidative Stress Induced Senescence Due to p16INK4A Defects                            | 0.020 | 0.124 | CDK6                                    |
| Evasion of Oncogene Induced Senescence Due to p16INK4A Defects                                    | 0.020 | 0.124 | CDK6                                    |
| Signaling by TGF-beta Receptor Complex                                                            | 0.020 | 0.124 | PPP1CC;E2F5;TGFBR2                      |
| NR1H2 and NR1H3-mediated signaling                                                                | 0.020 | 0.124 | SCD;TNRC6B                              |
| Estrogen-dependent gene expression                                                                | 0.020 | 0.124 | YY1;BCL2;TNRC6B                         |
| Processive synthesis on the C-strand of the telomere                                              | 0.021 | 0.127 | CDC27;RPA2                              |
| Termination of translesion DNA synthesis                                                          | 0.023 | 0.132 | CDC27;RPA2                              |
| TGF-beta receptor signaling activates SMADs                                                       | 0.024 | 0.132 | PPP1CC;TGFBR2                           |
| Activation of the pre-replicative complex                                                         | 0.024 | 0.132 | RPA2                                    |
| Loss of Function of TGFBR2 in Cancer                                                              | 0.026 | 0.132 | TGFBR2                                  |
| TGFBR2 Kinase Domain Mutants in Cancer                                                            | 0.026 | 0.132 | TGFBR2                                  |
| TGFBR1 LBD Mutants in Cancer                                                                      | 0.026 | 0.132 | TGFBR2                                  |
| tRNA-derived small RNA (tsRNA or tRNA-related fragment, tRF) biogenesis                           | 0.026 | 0.132 | DICER1                                  |
| Diseases of cellular response to stress                                                           | 0.026 | 0.132 | CDK6                                    |
| Diseases of Cellular Senescence                                                                   | 0.026 | 0.132 | CDK6                                    |
| DNA strand elongation                                                                             | 0.027 | 0.137 | CDC27;RPA2                              |
| ESR-mediated signaling                                                                            | 0.029 | 0.149 | YY1;BCL2;PIK3R3;TNRC6B                  |
| DNA Damage Recognition in GG-NER                                                                  | 0.030 | 0.151 | YY1;INO80D                              |
| Dual Incision in GG-NER                                                                           | 0.031 | 0.158 | CDC27;RPA2                              |
| RAF activation                                                                                    | 0.031 | 0.158 | PPP1CC;SHOC2                            |
| Oncogene Induced Senescence                                                                       | 0.033 | 0.158 | CDK6;TNRC6B                             |
| The NLRP1 inflammasome                                                                            | 0.033 | 0.158 | BCL2                                    |

|                                                                                    |       |       |                              |
|------------------------------------------------------------------------------------|-------|-------|------------------------------|
| S Phase                                                                            | 0.033 | 0.158 | CDC27;RPA2;E2F5              |
| Homologous DNA Pairing and Strand Exchange                                         | 0.035 | 0.158 | RAD51AP1;RPA2                |
| RHO GTPase cycle                                                                   | 0.035 | 0.158 | DST;SPTBN1                   |
| Extra-nuclear estrogen signaling                                                   | 0.038 | 0.158 | BCL2;PIK3R3                  |
| Mitotic Spindle Checkpoint                                                         | 0.039 | 0.158 | PPP1CC;TAOK1;CDC27           |
| TGFBR1 KD Mutants in Cancer                                                        | 0.039 | 0.158 | TGFBR2                       |
| Hyaluronan biosynthesis and export                                                 | 0.039 | 0.158 | HAS2                         |
| NADE modulates death signalling                                                    | 0.039 | 0.158 | DCP2                         |
| Translesion synthesis by Y family DNA polymerases bypasses lesions on DNA template | 0.042 | 0.168 | CDC27;RPA2                   |
| Resolution of Abasic Sites (AP sites)                                              | 0.042 | 0.168 | CDC27;RPA2                   |
| Oxidative Stress Induced Senescence                                                | 0.042 | 0.169 | CBX6;CDK6;TNRC6B             |
| FOXO-mediated transcription of oxidative stress, metabolic and neuronal genes      | 0.043 | 0.174 | SOD2                         |
| Loss of Function of TGFBR1 in Cancer                                               | 0.046 | 0.184 | TGFBR2                       |
| SMAD2/3 Phosphorylation Motif Mutants in Cancer                                    | 0.046 | 0.184 | TGFBR2                       |
| Post-transcriptional silencing by small RNAs                                       | 0.046 | 0.184 | TNRC6B                       |
| Deubiquitination                                                                   | 0.046 | 0.185 | YY1;UCHL1;INO80D;MBD6;TGFBR2 |
| Cellular Senescence                                                                | 0.046 | 0.187 | CBX6;CDK6;CDC27;TNRC6B       |
| Telomere C-strand (Lagging Strand) Synthesis                                       | 0.046 | 0.187 | CDC27;RPA2                   |
